# Supplementary material for: Copper(i) cysteine complexes: efficient earth-abundant oxidation co-catalysts for visible light-driven photocatalytic H2 production
Source: Royal Society of Chemistry journal article supplement (doi:10.1039/c5cc04739k), 2015-01-01
Supplement: c5cc04739k1.pdf [file c5cc04739k1.pdf]

## Supporting Information

# Copper (I) Cysteine Complexes: Efficient Earth-Abundant Oxidation Co-catalysts for Visible Light-Driven Photocatalytic H<sub>2</sub> Production†

Yong Peng,<sup>a,b</sup> Lu Shang,<sup>a</sup> Yitao Cao,<sup>a,b</sup> Geoffrey I.N. Waterhouse,<sup>c</sup> Chao Zhou,<sup>a</sup> Tong Bian,<sup>a</sup> Li-Zhu Wu,<sup>a</sup> Chen-Ho Tung<sup>a</sup> and Tierui Zhang<sup>\*a</sup>

<sup>a</sup>Key Laboratory of Photochemical Conversion and Optoelectronic Materials, Technical Institute of Physics and Chemistry, Chinese Academy of Sciences, Beijing, 100190, P. R. China. E-mail: tierui@mail.ipc.ac.cn; Fax: +86 10 62554670; Tel: +86 10 82543428

<sup>b</sup>University of Chinese Academy of Sciences, Beijing, 10049, P. R. China

<sup>c</sup>School of Chemical Sciences, The University of Auckland, Auckland 1142, New Zealand

## Experimental Section

### *Synthesis of CdSe nanosheets.*

CdSe nanosheets were prepared according to methods described in our previous report.<sup>1</sup> Typically, 110.96 mg SeO<sub>2</sub> and 266.53 mg Cd(CH<sub>3</sub>COO)<sub>2</sub> were added into 40 mL diethylenetriamine in a beaker. The mixture was then heated to 55 °C in water bath and maintained at this temperature for about 30 min. The yellow turbid liquid obtained was transferred into a Teflon-lined autoclave and heated at 140 °C for 16 h. The final products were collected and washed with deionized water and ethanol for several times, and then dried under vacuum at 40 °C overnight.

### *Synthesis of Sn<sub>2</sub>Nb<sub>2</sub>O<sub>7</sub>.*

Sn<sub>2</sub>Nb<sub>2</sub>O<sub>7</sub> was prepared according to a literature procedure.<sup>2</sup> Typically, a mixture of 0.4 g Nb<sub>2</sub>O<sub>5</sub> and 36 mL of 3 mol/L KOH solution was heated at 200 °C for 12 h in a sealed Teflon stainless autoclave. To 16 mL of the resulting clear solution, 0.38 g of SnCl<sub>2</sub> and 3 g of urea were added and ultrasonicated for 5 min. Then the solution was transferred into a 20 mL Teflon stainless autoclave. After that the sealed Teflon stainless autoclave was kept at 200 °C for 12 h, the final products were collected by filtration, washed with deionized water and absolute ethanol for

several times, and dried under vacuum at 40 °C overnight.

### ***Characterization.***

Scanning electron microscopic (SEM) images were collected on a Hitachi S-4800 scanning electron microscope equipped with an Energy dispersive spectrometer (EDS). Cyclic voltammogram (CV) tests were carried out on a Chi660e instrument (Shanghai Chenhua). X-ray photoelectron spectroscopy (XPS) was obtained on a PHI Quantro SXM instrument. All binding energies were referenced to the C 1s peak (284.8 eV) arising from carbon impurities. High resolution electrospray ionization mass (HR-ESI-MS) data were obtained on an ApexIII (7.0 tesla) FTICR mass spectrometer (Bruker). <sup>1</sup>H NMR spectra were obtained on a Bruker AVNANCE 400 spectrometer. Electron spin resonance (ESR) experiments were performed on a Bruker E500 instrument. The amount of copper in Cu-cysteine complexes was measured by using inductively coupled plasma (ICP) optical emission spectroscopy on a Varian 710-OES instrument. Elemental analysis for C, N, and H was performed on a Vario EL III Element analyzer. Diffuse reflectance spectra (DRS) were measured using a Cary 5000 spectrophotometer with an integrating sphere scanning from 200-800 nm with BaSO<sub>4</sub> as the reference.

### ***Preparation of Pt loaded Sn<sub>2</sub>Nb<sub>2</sub>O<sub>7</sub>.***

Pt loaded Sn<sub>2</sub>Nb<sub>2</sub>O<sub>7</sub> samples were prepared by a facile photodeposition method. 10 mg of Sn<sub>2</sub>Nb<sub>2</sub>O<sub>7</sub> powder was dispersed in a 60 mL quartz tube containing 20 mL of a 20 vol. % methanol aqueous solution. Then, 14  $\mu$ L H<sub>2</sub>PtCl<sub>6</sub> solution (18.49 mmol/L) was added. Subsequently, the quartz tube was deaerated with N<sub>2</sub> for at least 30 min and then sealed with a rubber septum. The suspension was irradiated with a 500 W high-pressure mercury lamp for 30 min under magnetic stirring (XPA-7 photochemical reactor, Nanjing Xujiang Machine-electronic Plant). The temperature of the suspension during irradiation was maintained at 298 K using a thermostatically controlled water bath. Pt loaded Sn<sub>2</sub>Nb<sub>2</sub>O<sub>7</sub> was isolated by centrifugation.

### ***Photocatalytic H<sub>2</sub> evolution activity.***

The photocatalytic reactions were carried out in a 60 mL quartz vessel sealed with a rubber septum. The photocatalyst powders were dispersed in a 20 mL aqueous solution with a given concentration of cysteine as the sacrificial agents. Then the pH was adjusted to ~5.2 with 0.1 M

NaOH. The suspension was dispersed by ultrasonic treatment for 10 min, following by adding a specific amount of copper nitrate, and then deaerated with N<sub>2</sub> for 30 min to remove O<sub>2</sub> and then sealed with a rubber septum. A 300 W Xenon lamp equipped with an ultraviolet cut-off filter ( $\lambda > 400$  nm) (PLS-SXE300C photochemical reactor, Perfect Light Ltd, Beijing) was used as the light source. The temperature of the reaction system was maintained at room temperature by a flow of water. The amount of evolved H<sub>2</sub> was determined by a Shimadzu GC-2014 gas chromatograph (N<sub>2</sub> carrier gas, molecular sieve 5 Å, TCD detector).

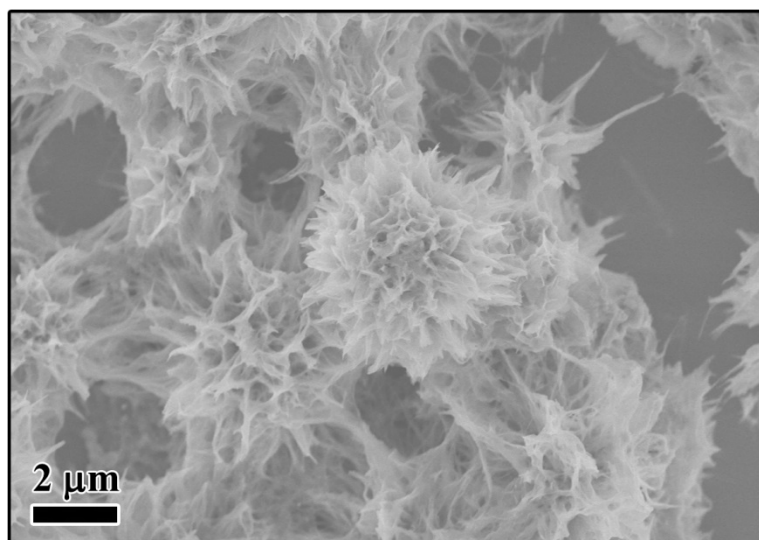

**Fig. S1** SEM image of flower-like CdSe nanosheet assemblies.

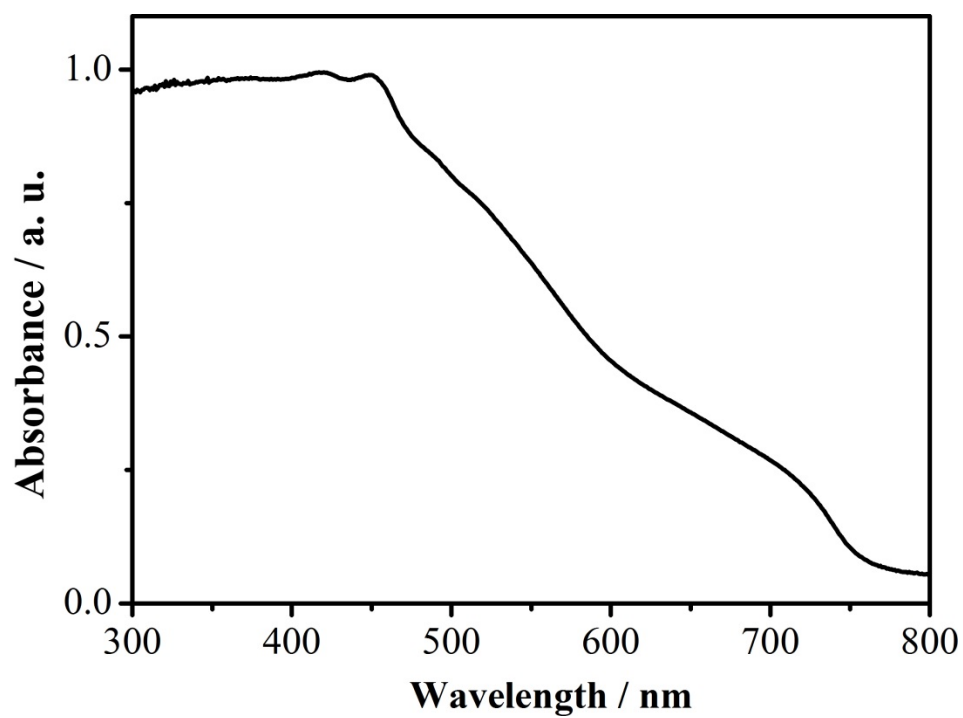

Fig. S2 UV-Vis DRS spectrum of flower-like CdSe nanosheet assemblies.

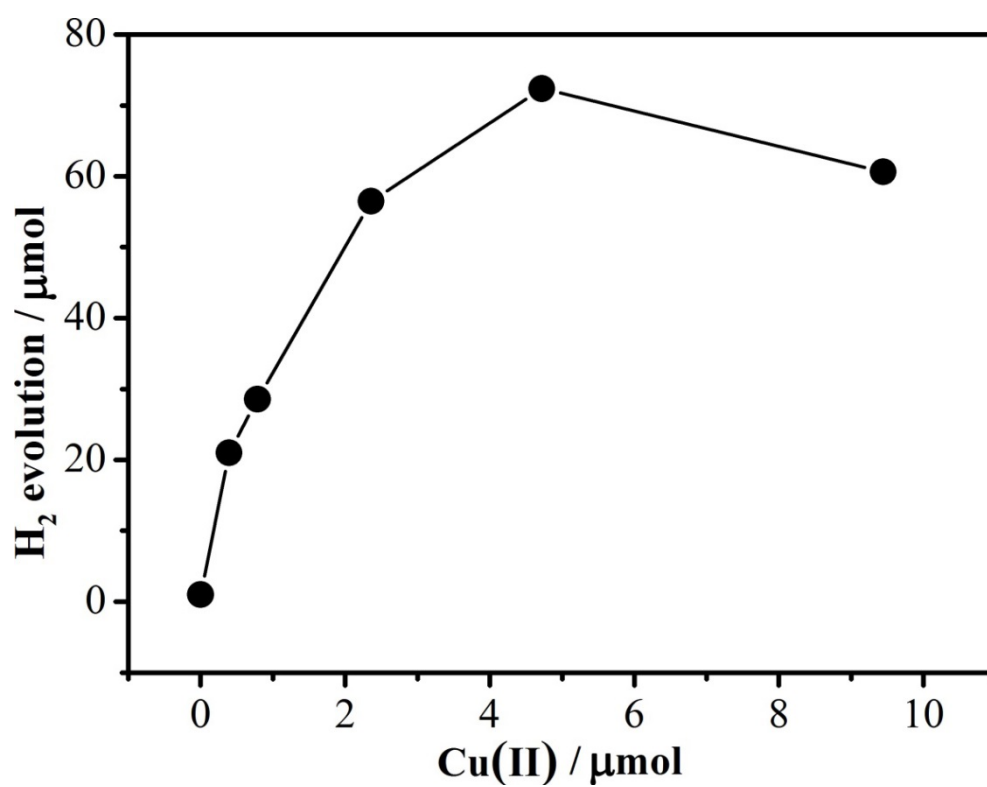

Fig. S3 Photocatalytic H<sub>2</sub> evolution rates with different amounts of Cu(II).

Pengsong-2\_141230143405 #11 RT: 0.12 AV: 1 NL: 1.67E8  
T: FIMS - p ESI Full ms [60.00-900.00]

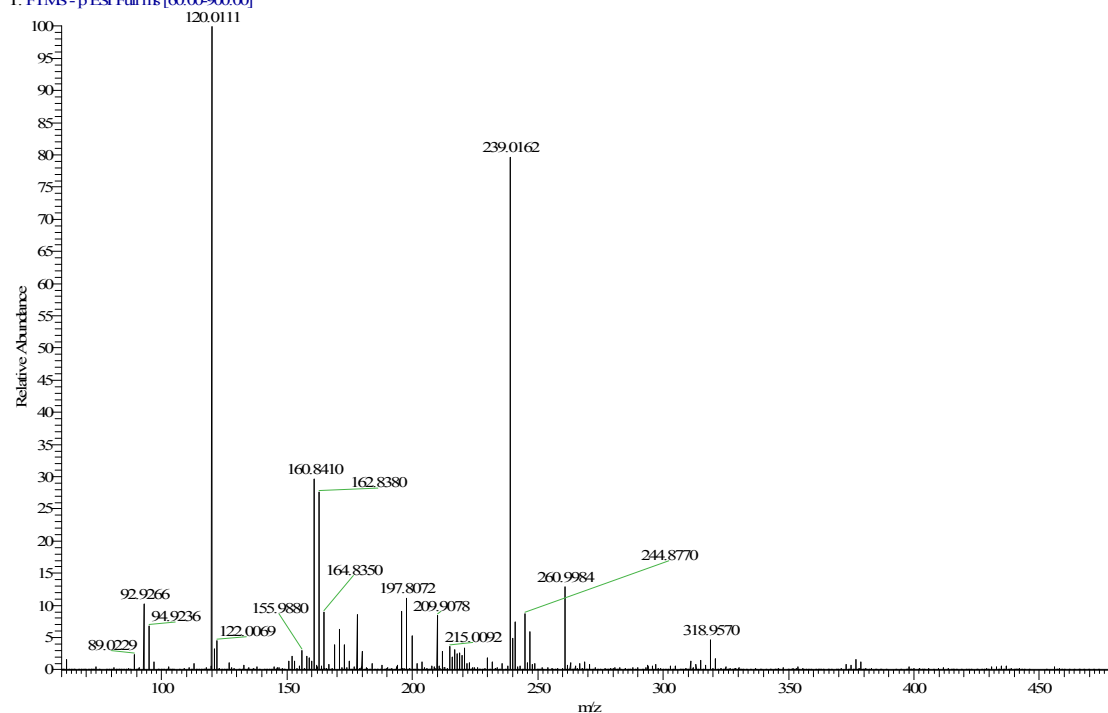

**Fig. S4** HR-ESI-MS spectrum of the product obtained from the filtrate of the photocatalytic system containing CdSe, cysteine and Cu(I)-cysteine complex after irradiation for 1 h.

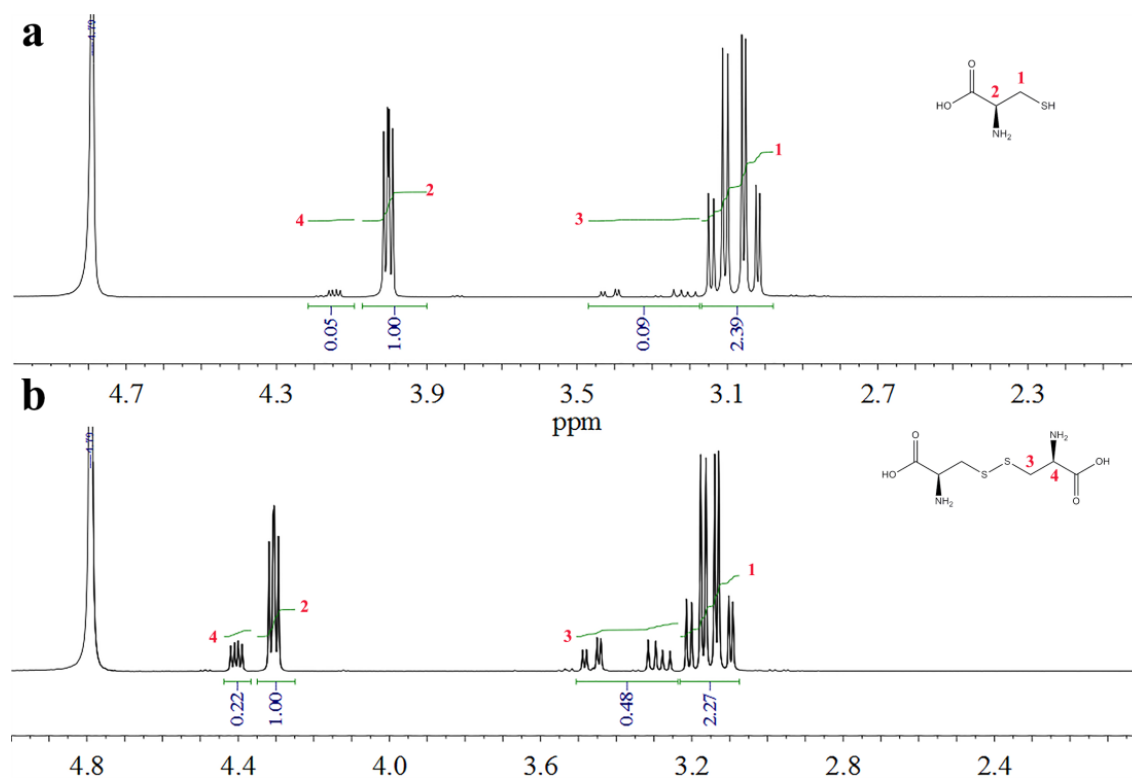

**Fig. S5**  $^1\text{H}$  NMR spectra of (a) pure cysteine and (b) the product obtained from the filtrate of the photocatalytic system containing CdSe, cysteine and Cu(I)-cysteine complex after irradiation for 1 h.

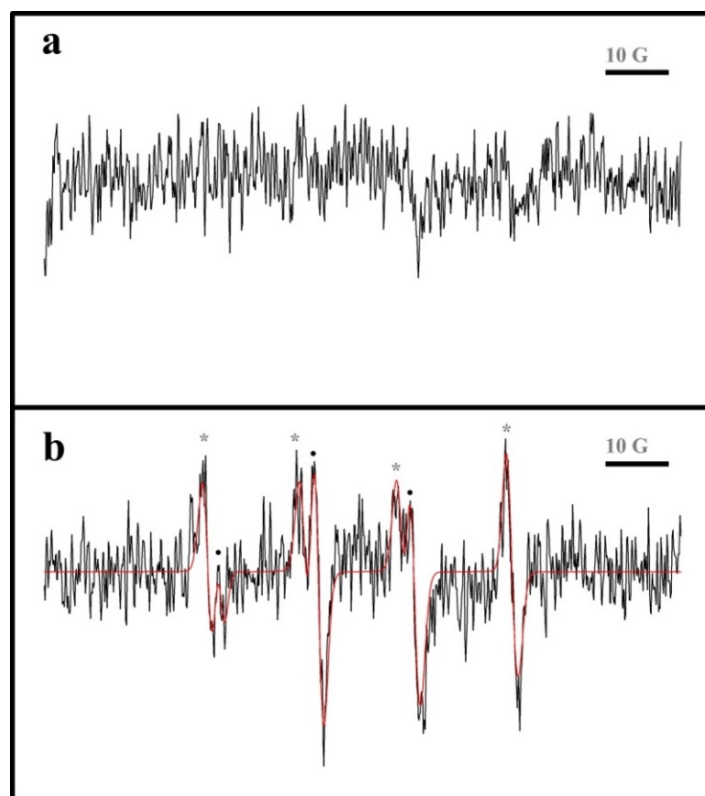

**Fig. S6** ESR signals of an aqueous solution containing 0.1 mol cysteine, 1 mg CdSe, 6 wt. % Cu(II) ions and 0.02 M DMPO (a) before and (b) after visible light irradiation ( $\lambda > 400$  nm) (Red line, fitted curve). (\* stands for the sulfenyl radical signals. • stands for the hydroxyl radical signals, which could originate from the reaction of holes with surface adsorbed water or hydroxyl groups)

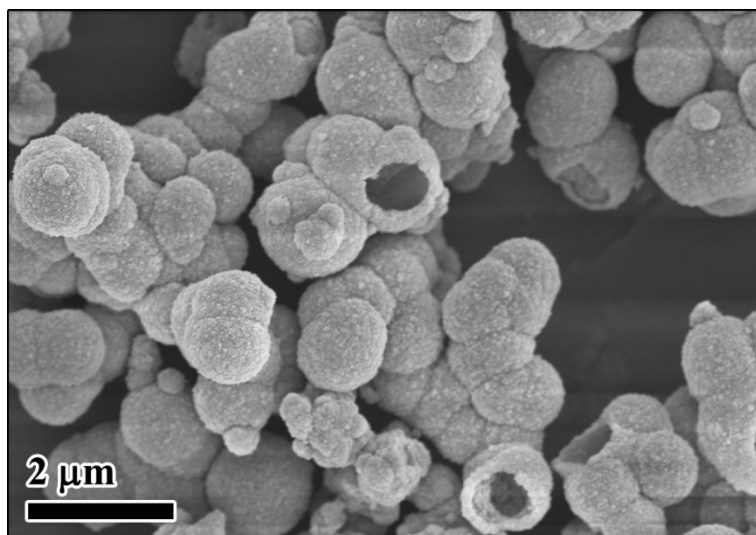

**Fig. S7** SEM image of hollow  $\text{Sn}_2\text{Nb}_2\text{O}_7$  spheres.

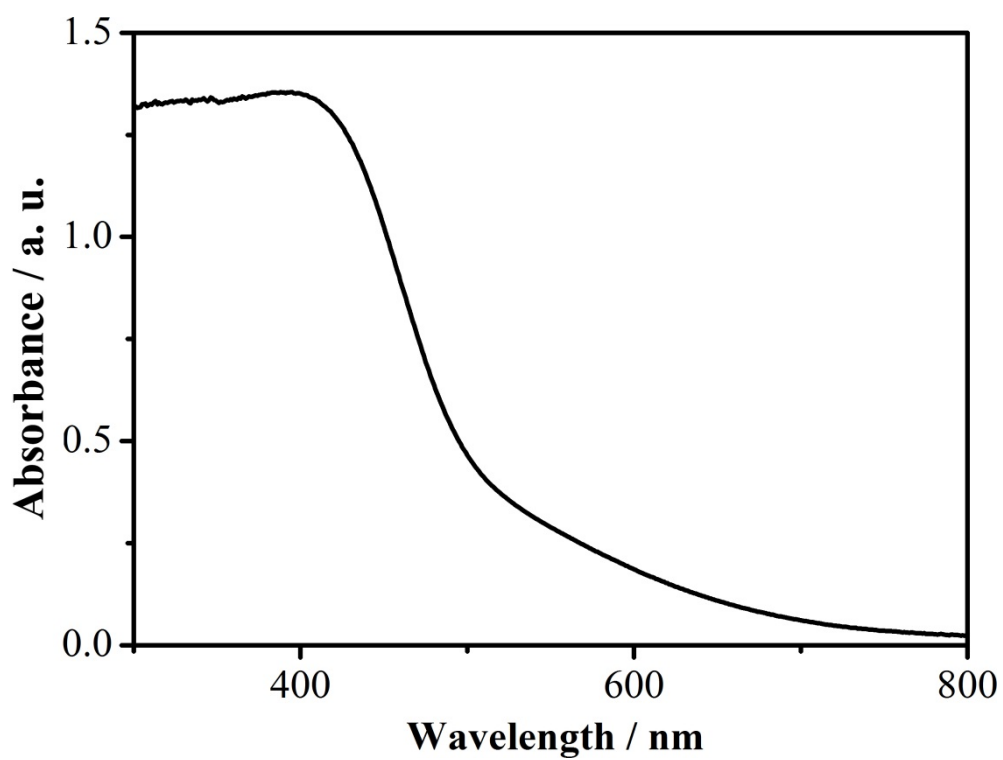

Fig. S8 UV-Vis DRS spectrum of hollow  $\text{Sn}_2\text{Nb}_2\text{O}_7$  spheres.

- 1 Y. Peng, L. Shang, T. Bian, Y. Zhao, C. Zhou, H. Yu, L.-Z. Wu, C.-H. Tung and T. R. Zhang, *Chem. Commun.*, 2015, **51**, 4677-4680.
- 2 C. Zhou, Y. F. Zhao, T. Bian, L. Shang, H. J. Yu, L. Z. Wu, C. H. Tung and T. R. Zhang, *Chem. Commun.*, 2013, **49**, 9872-9874.
